# Supplementary material for: Centriole and Golgi microtubule nucleation are dispensable for the migration of human neutrophil-like cells
Source: PubMed Central journal article supplement — Mol Biol Cell. 2021 Aug 15;32(17):1545–56. doi: 10.1091/mbc.E21-02-0060 (PMC8351748; doi:10.1091/mbc.e21-02-0060), 2021-08-15

# Supplemental Materials

Molecular Biology of the Cell

Klemm *et al.*

**Figure S1.** AKAP450 localization in GM130 knockout neutrophil-like PLB-985 cells. **(A)** Representative immunofluorescence images of either luciferase or GM130 KO3 PLB-985 cells stained for giantin (magenta), AKAP450 (green), and nuclei (cyan). Scale bar: 2.5  $\mu\text{m}$ .

A.

Luciferase

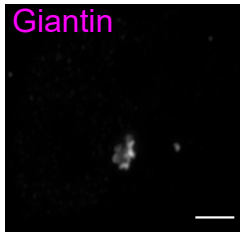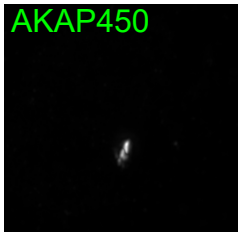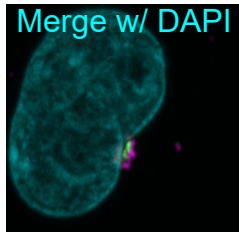

GM130 KO3

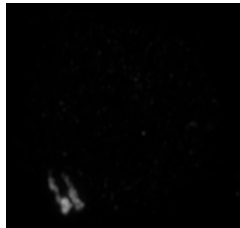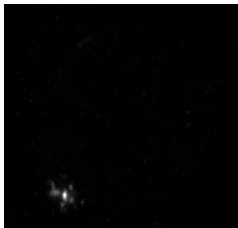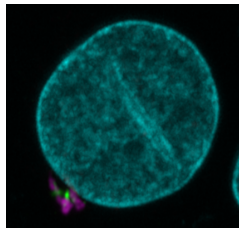

Supplement: mbc-32-1545-s001.pdf [file mbc-32-1545-s001.pdf]
